# Supplementary material
Source: publisher figshare collection journal article supplement (https://karger.figshare.com/ndownloader/files/15342680)

Supplementary Table 1: Caries Indices and Tooth/Surface Counts (N=36) using VERDICT and using CARIN with SAS (N=24).

| **VERDICT Output** | **CARIN Output** | **Description** |
| --- | --- | --- |
| DMFTdmft | d2mft_a+ d2mft_c | Overall combined tooth score |
| DMFT | d2mft_a | Overall permanent tooth score |
| dmft | d2mft_c | Overall deciduous tooth score |
| DMFSdmfs | d2mfs_a+ d2mfs_c | Overall combined surface score |
| DMFS | d2mfs_a | Overall permanent surface score |
| dmfs | d2mfs_c | Overall deciduous surface score |
| DMFS+I+dmfs+i |  | Overall combined surface + incisal edges score |
| DMFS+I |  | Overall permanent surface + incisal edges score |
| dmfs+i |  | Overall deciduous surface + incisal edges score |
| DT | d2t_a | Decayed permanent tooth score |
| MT | mt_a | Missing permanent tooth score |
| FT | ft_a | Filled permanent tooth score |
| dt | d2t_c | Decayed deciduous tooth score |
| mt | mt_c | Missing deciduous tooth score |
| ft | ft_c | Filled deciduous tooth score |
| DS | d2s_a | Decayed permanent surface score |
| MS | ms_a | Missing permanent surface score |
| FS | fs_a | Filled permanent surface score |
| ds | d2s_c | Decayed deciduous surface score |
| ms | ms_c | Missing deciduous surface score |
| fs | fs_c | Filled deciduous surface score |
| DSI |  | Decayed permanent surface + incisal edges score |
| MSI |  | Missing permanent surface + incisal edges score |
| FSI |  | Filled permanent surface + incisal edges score |
| dsi |  | Decayed deciduous surface + incisal edges score |
| msi |  | Missing deciduous surface + incisal edges score |
| fsi |  | Filled deciduous surface + incisal edges score |
| Tt | currToothCount_c+ currToothCount_a | Overall tooth count |
| t | currToothCount_c | Deciduous tooth count |
| T | currToothCount_a | Permanent tooth count |
| Ss | currSurfaceCount_c+ currSurfaceCount_a | Overall surface count |
| s | currSurfaceCount_c | Deciduous surface count |
| S | currSurfaceCount_a | Permanent surface count |
| Sisi |  | Overall surface + incisal edges count |
| si |  | Deciduous surface + incisal edges count |
| Si |  | Permanent surface + incisal edges count |

Supplementary Table 2: Synthetic Use Case Scenarios VERDICT-Calculated and Validated Caries Indices and Tooth and Surface Counts (N=45)

.

Supplementary Figures: Synthetic Use Case Scenario Odontograms and Treatment Histories (N=45)


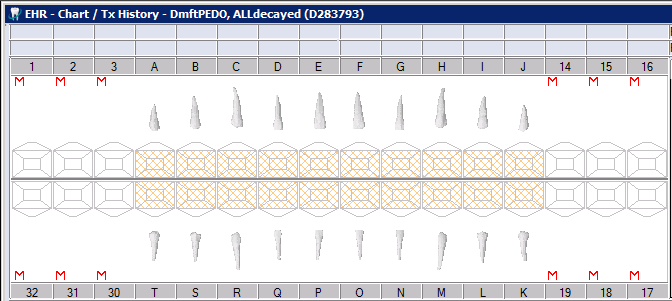

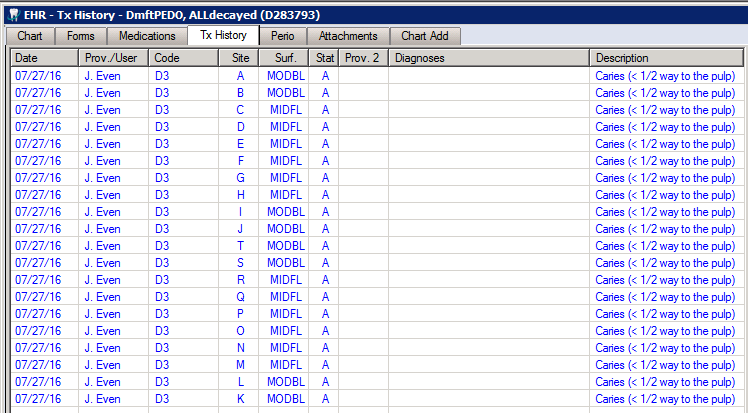

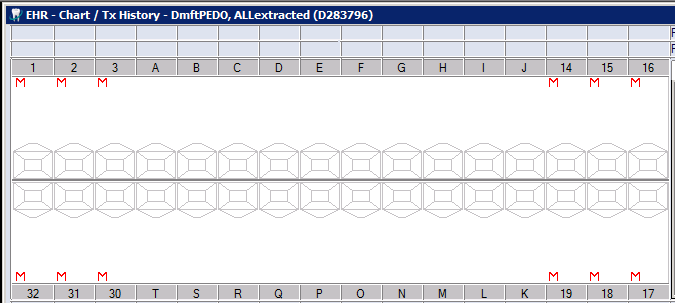

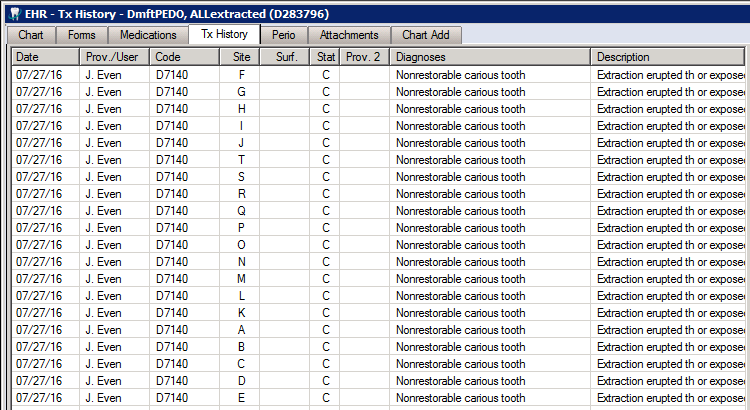


D283793

D283796


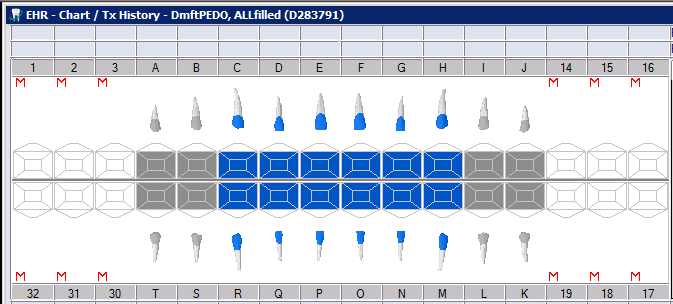

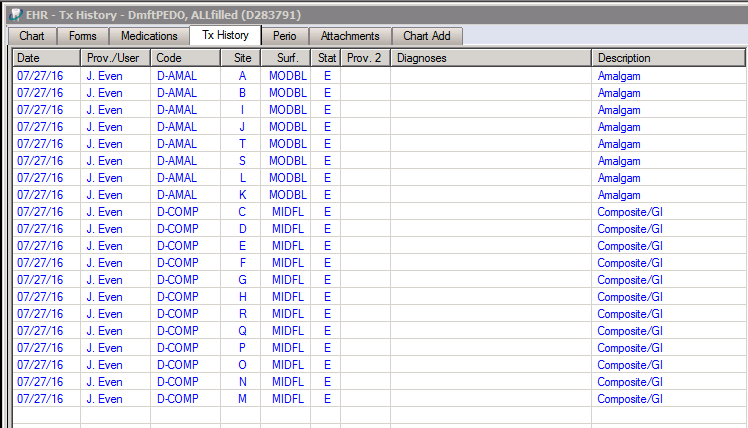


D283791


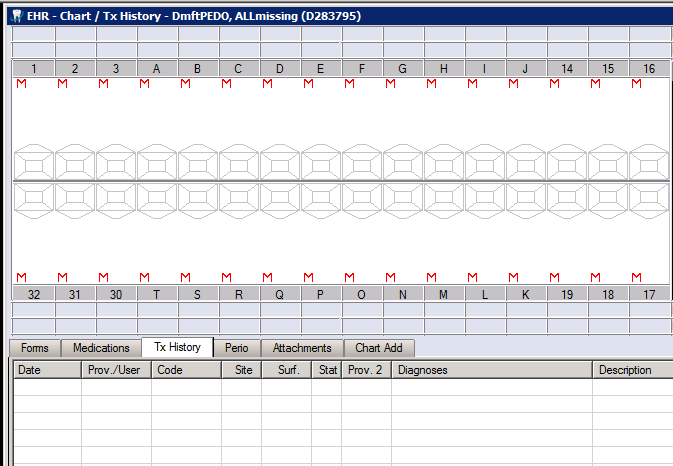


D283795


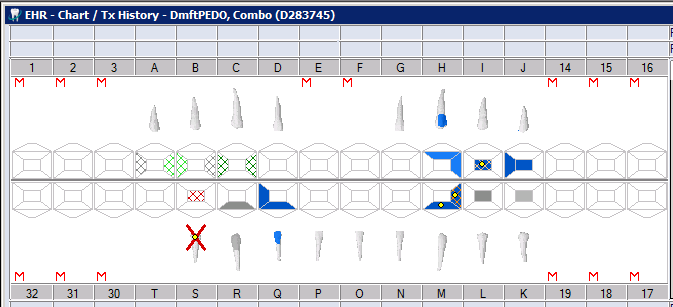

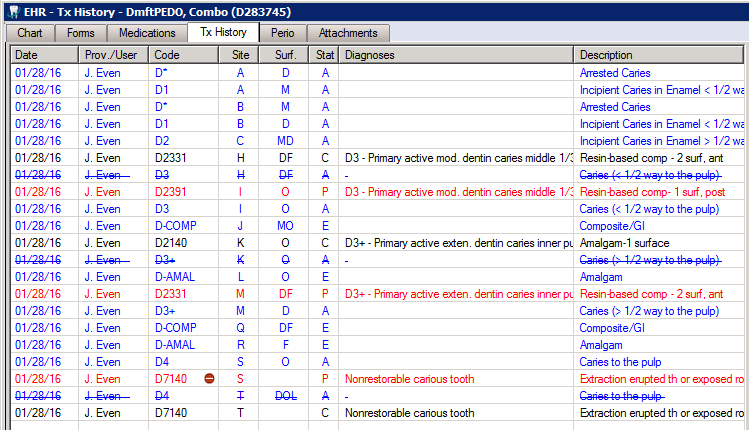


D283745

D283747


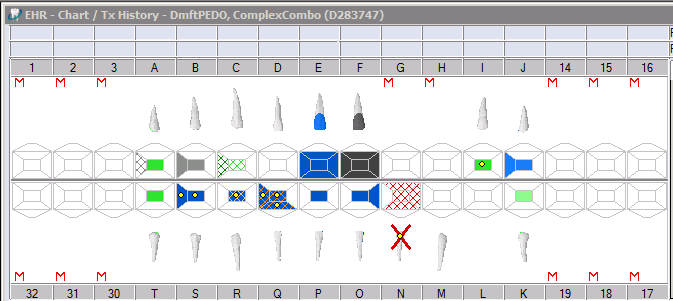

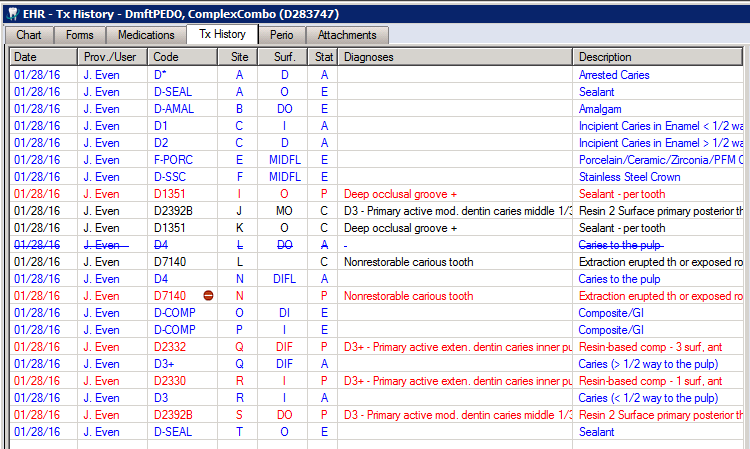

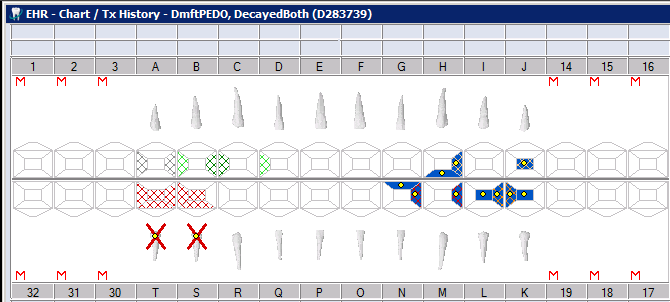

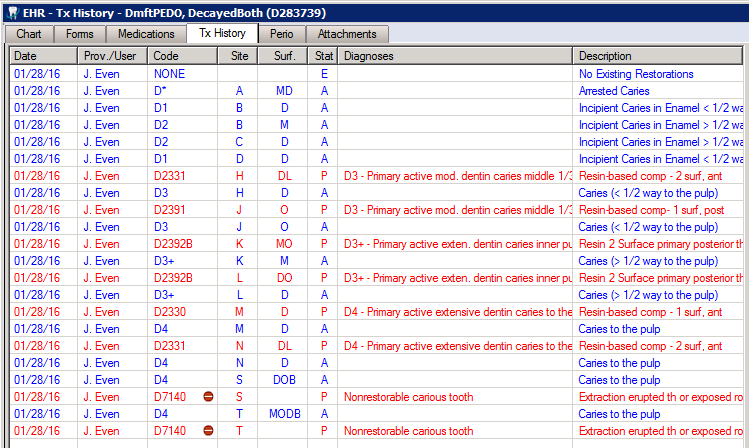


D283739

D283737


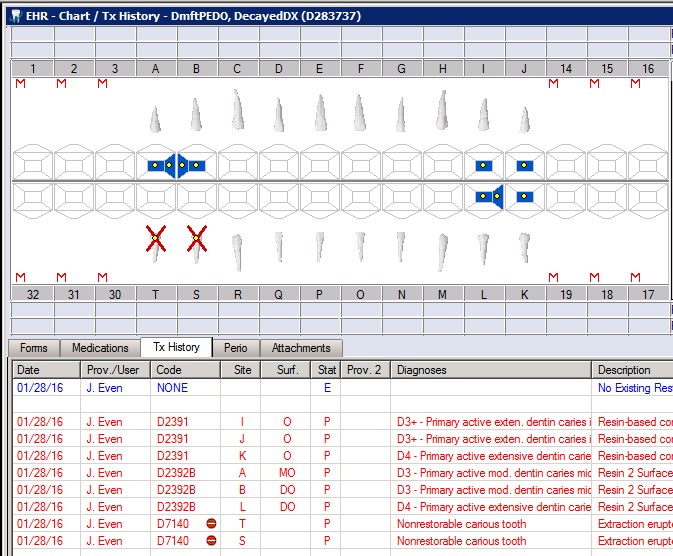

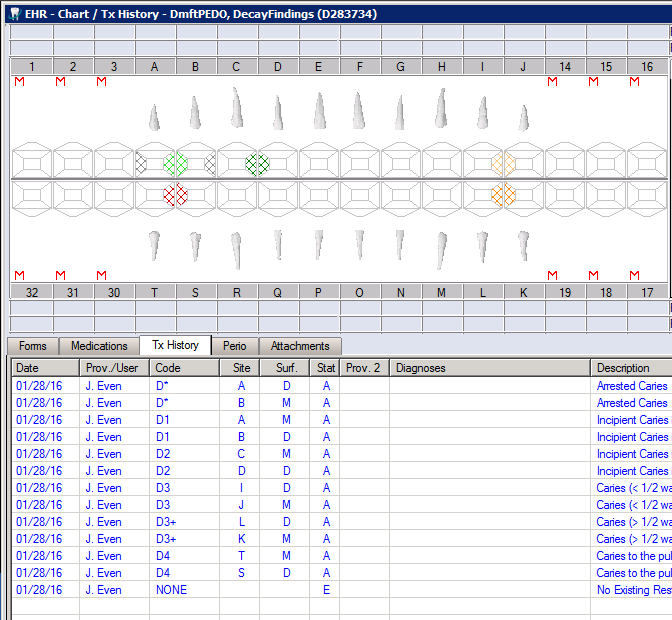


D283734

D283741


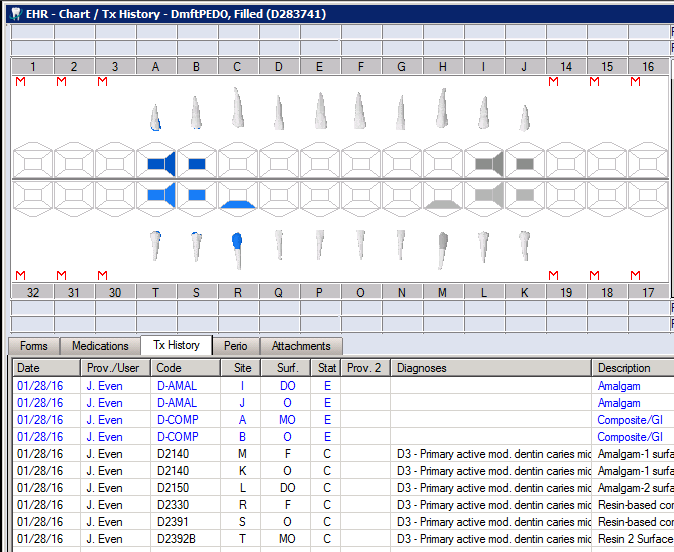

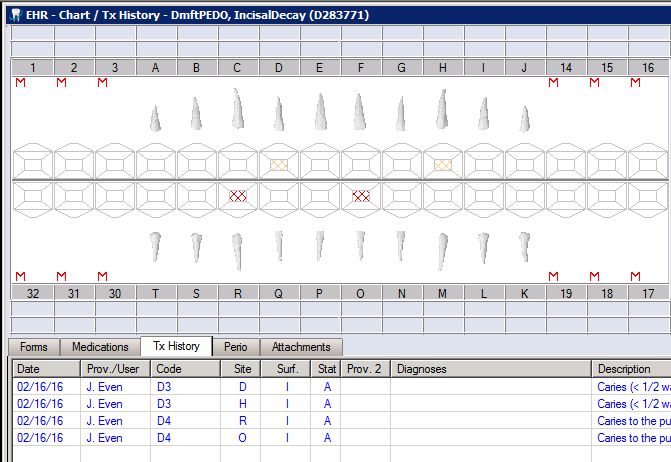


D283771

D283774


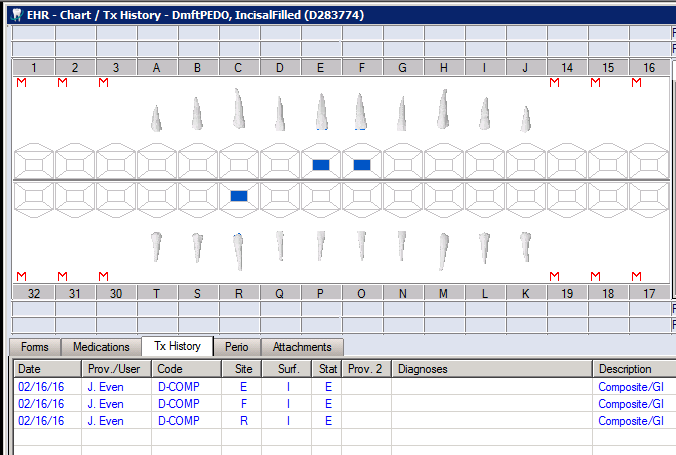

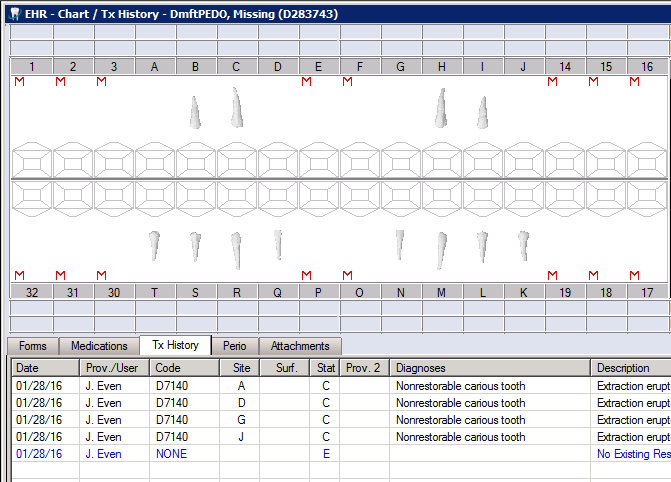


D283743

D283732


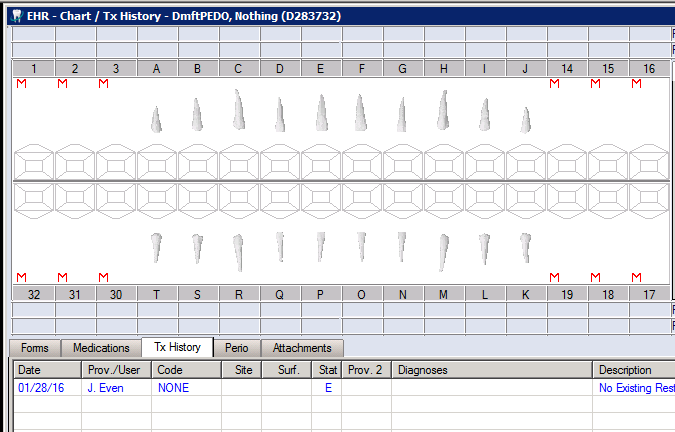


D283892

D283812


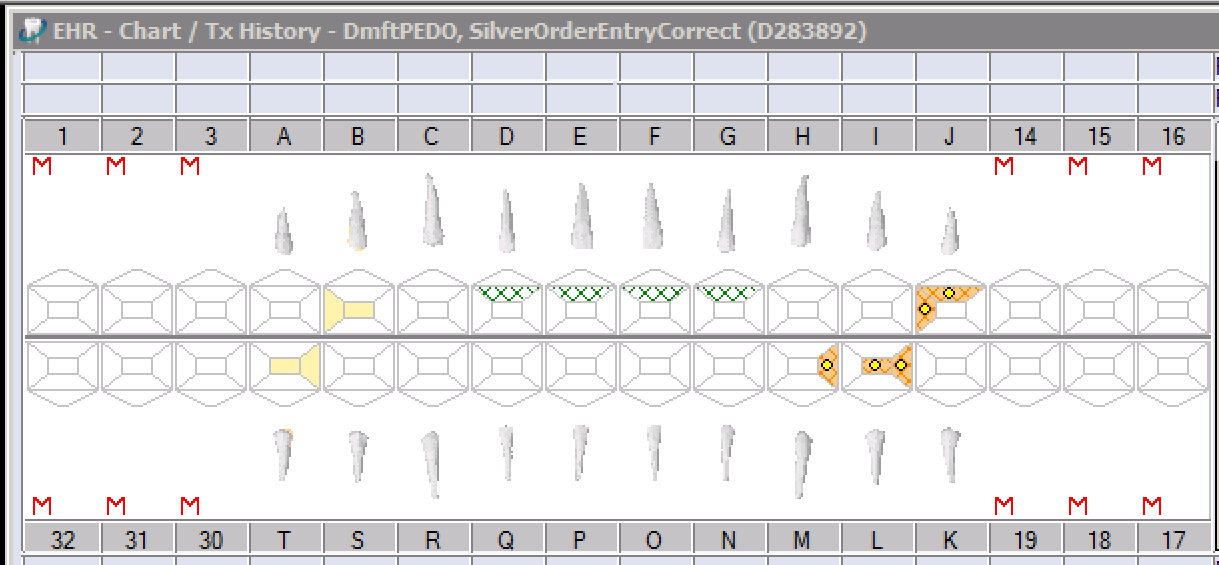

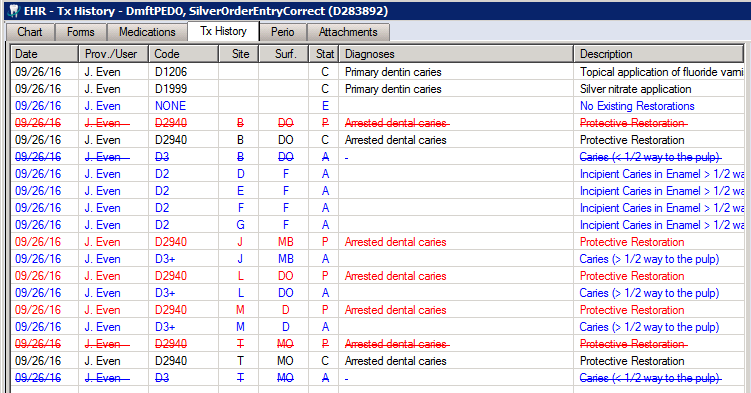

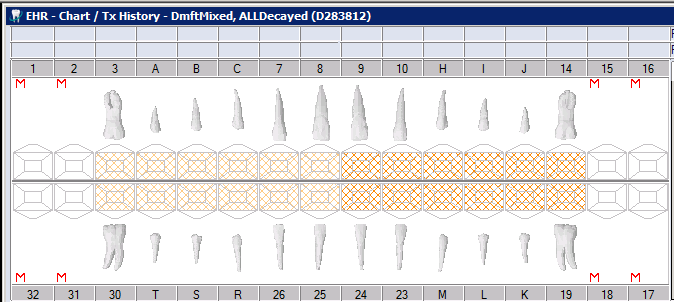

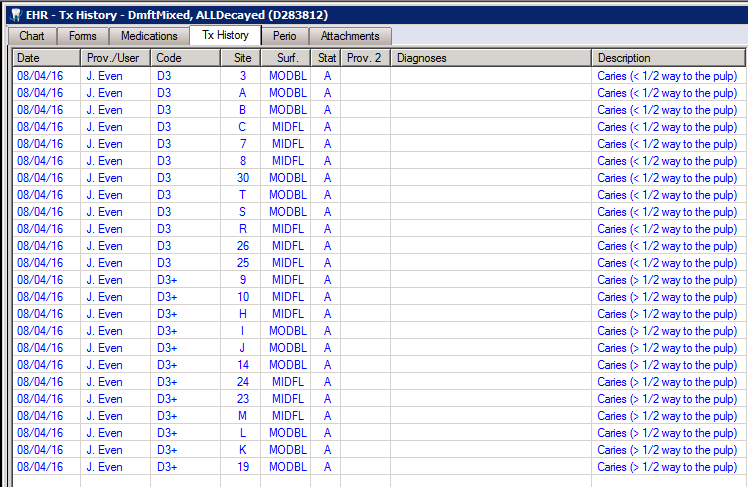

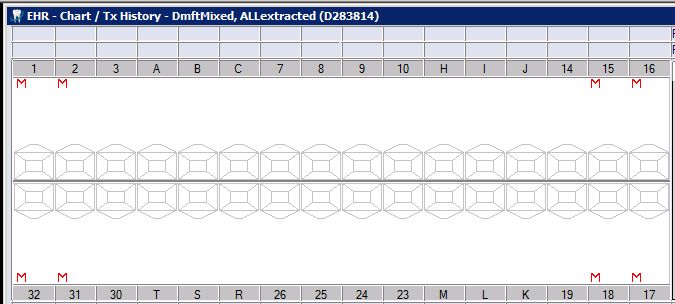

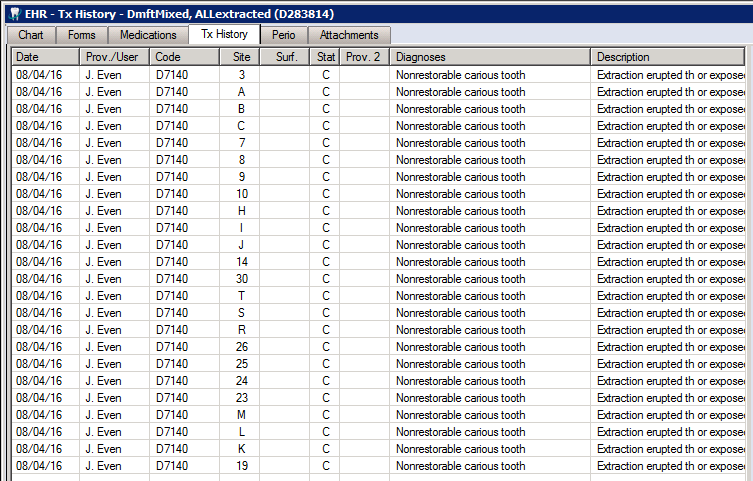


D283814

D283811


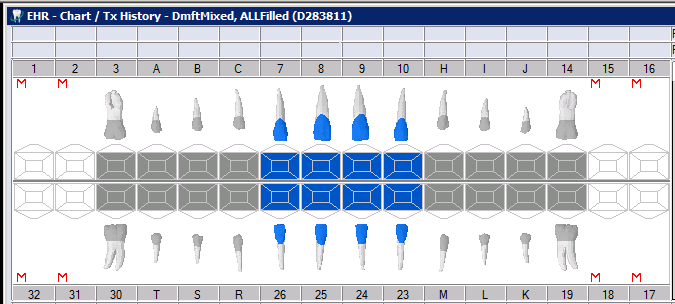

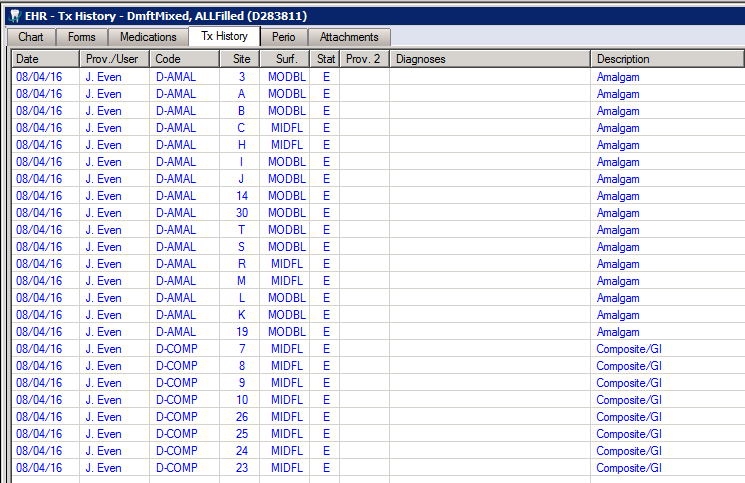


D283813

D283752


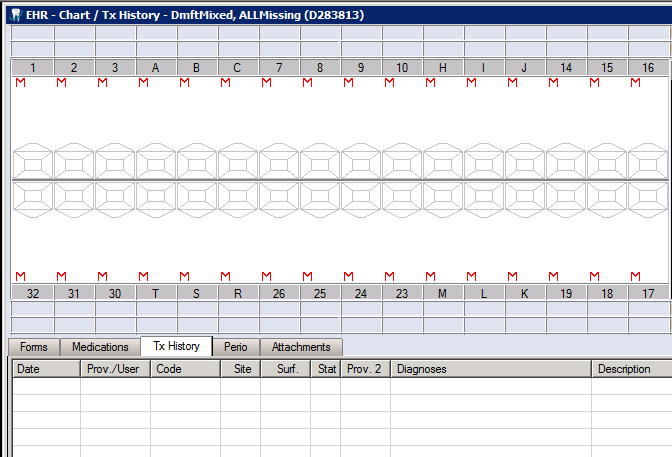

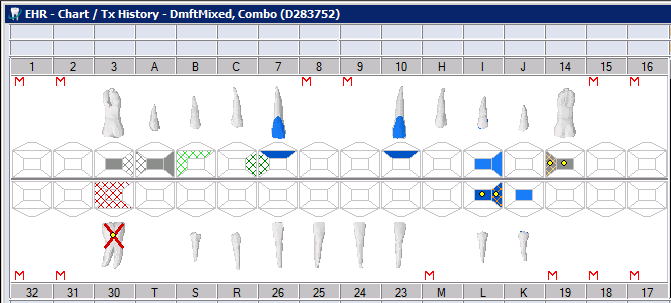

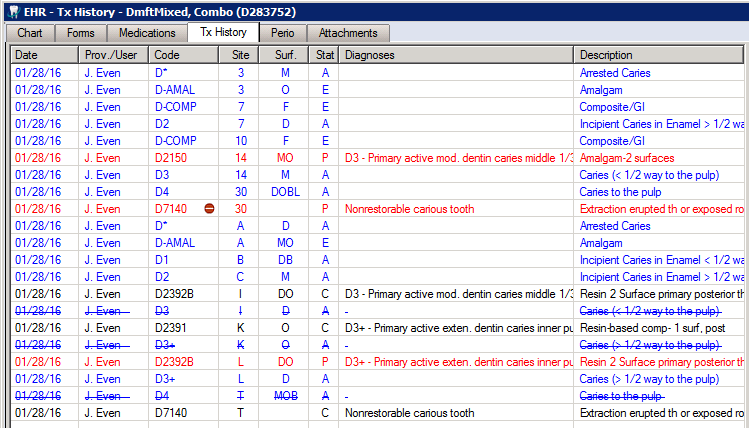


D283754

D283755


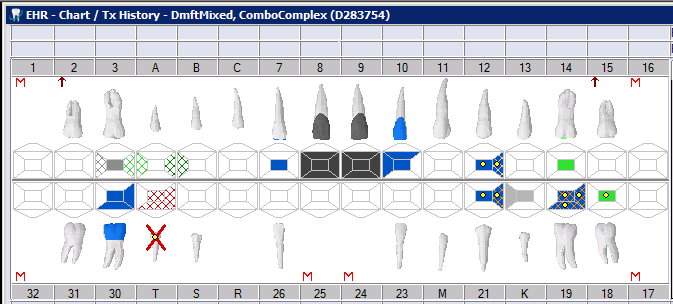

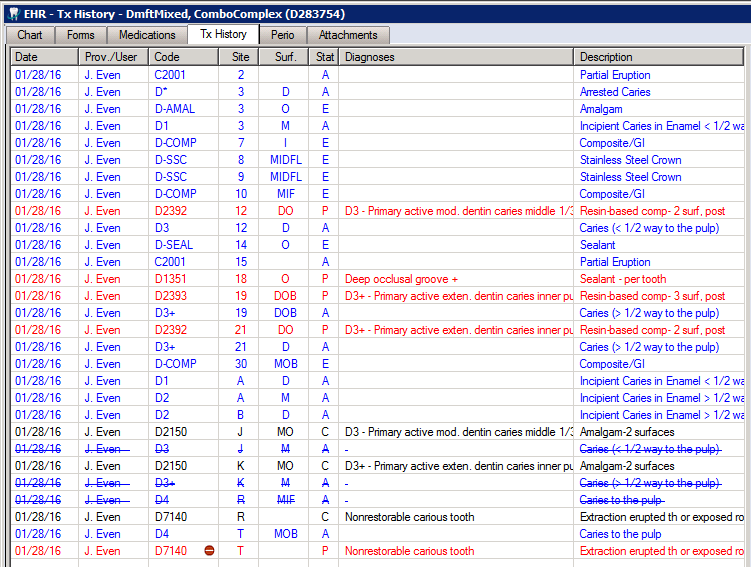

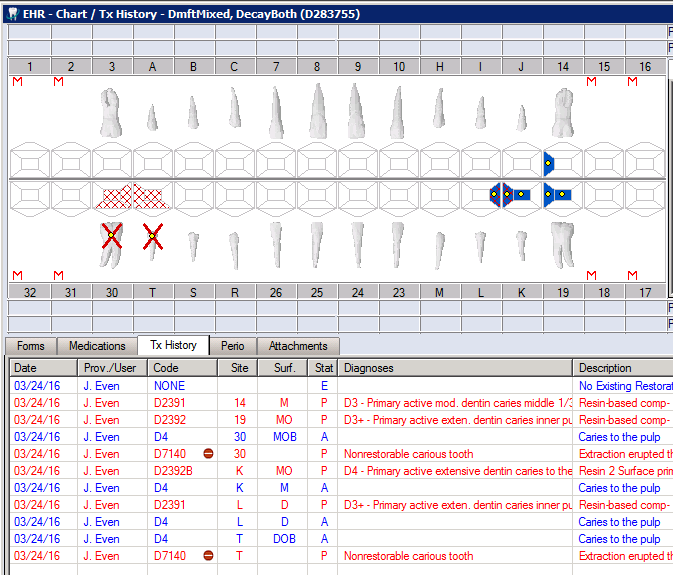


D283753

D283751


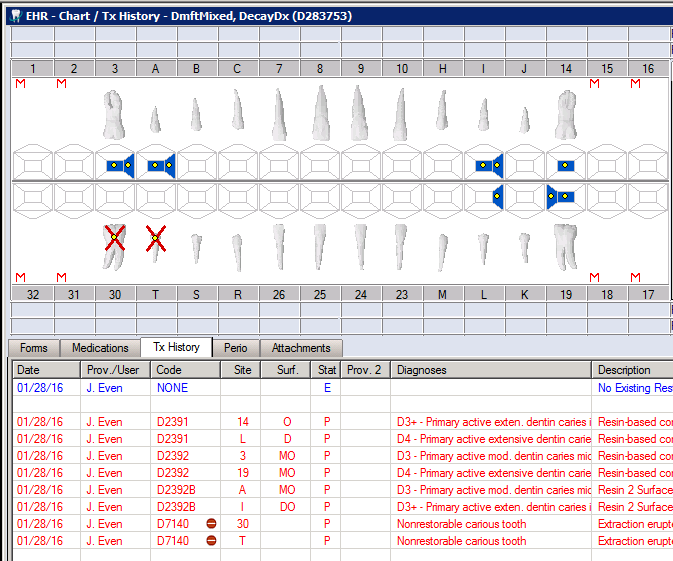

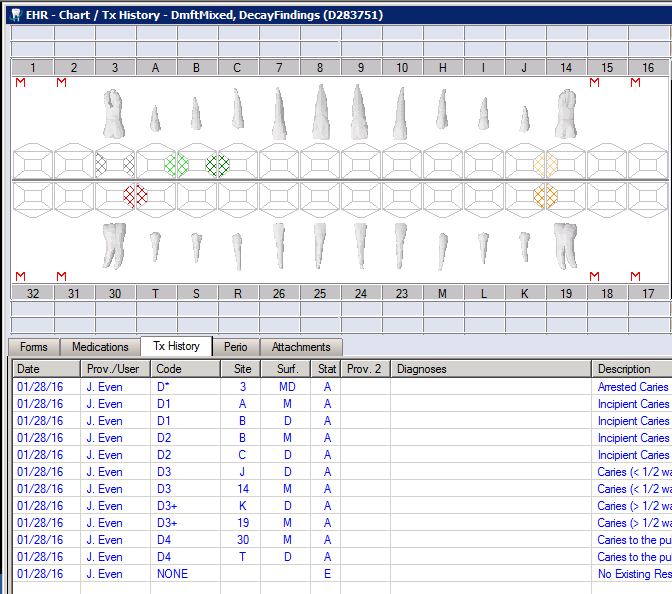


D283748

D283773


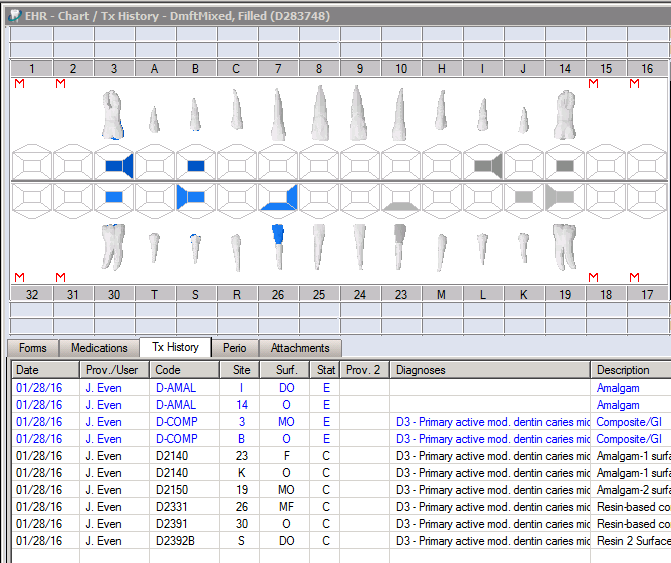

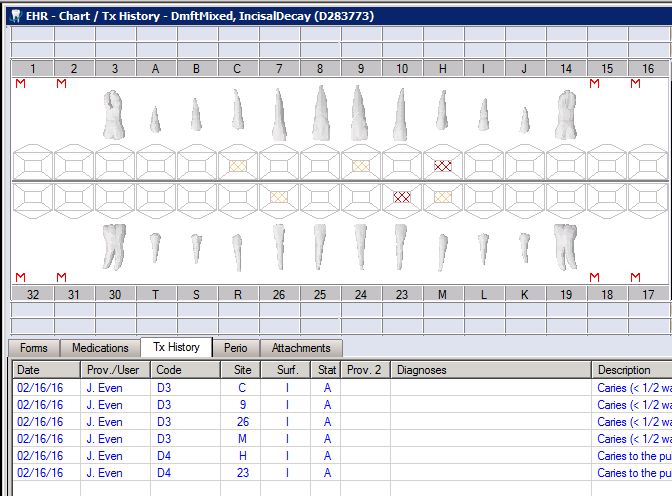


D283775

D283750


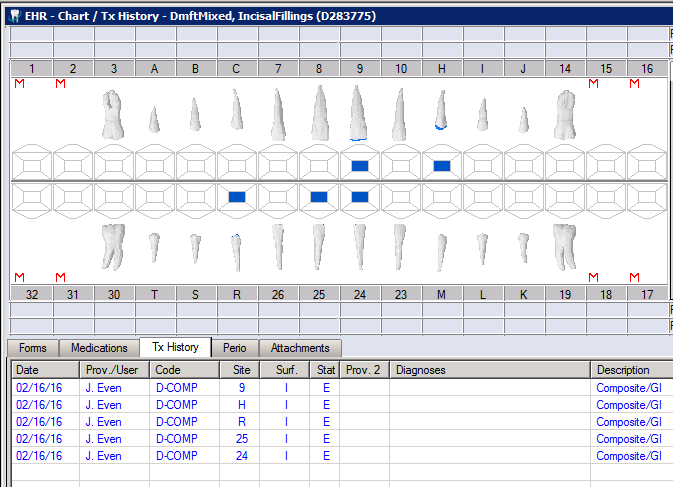

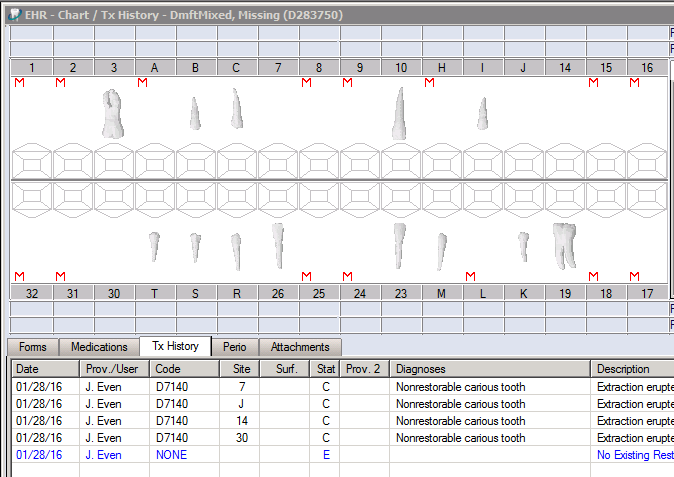


D283749

D283799


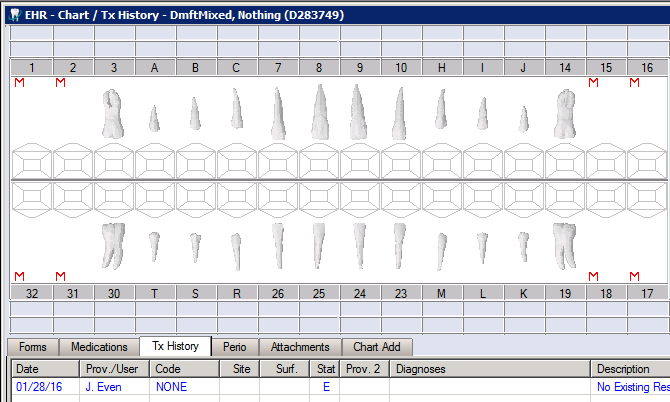

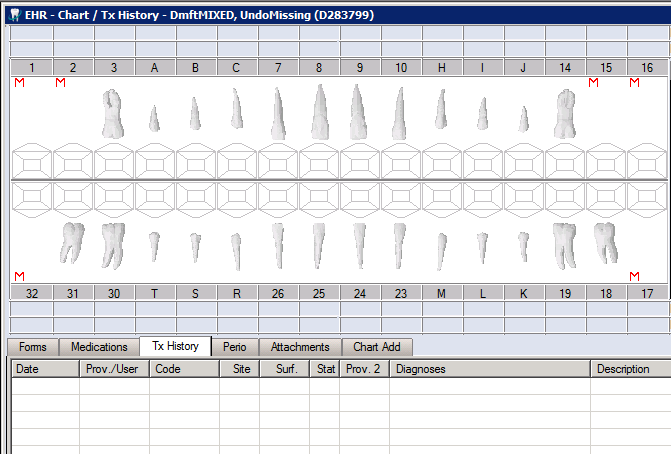


D283794

D283798


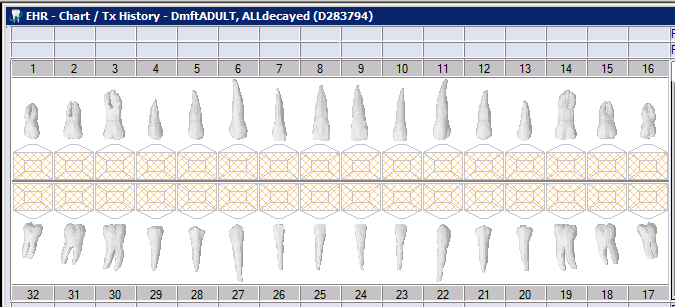

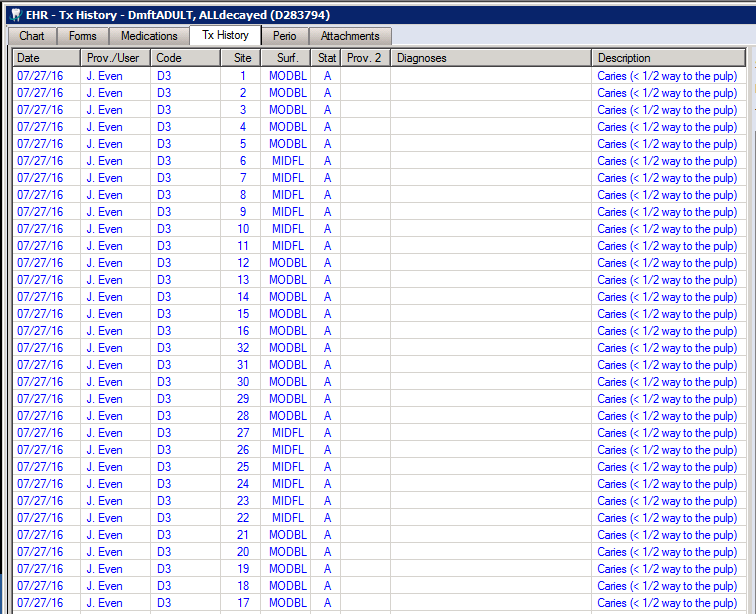

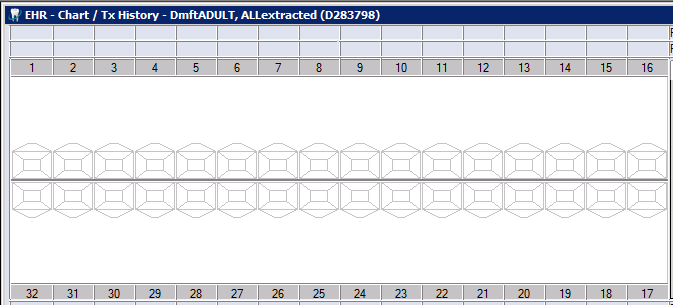

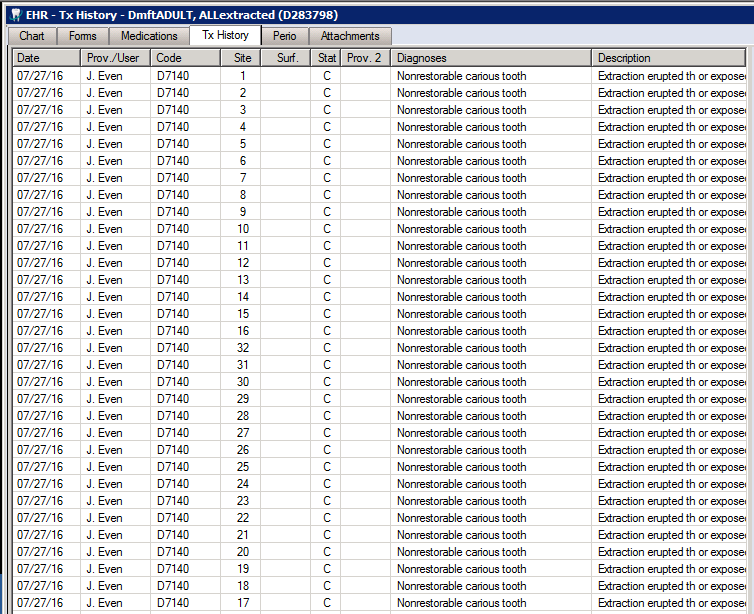


D283792

D283797


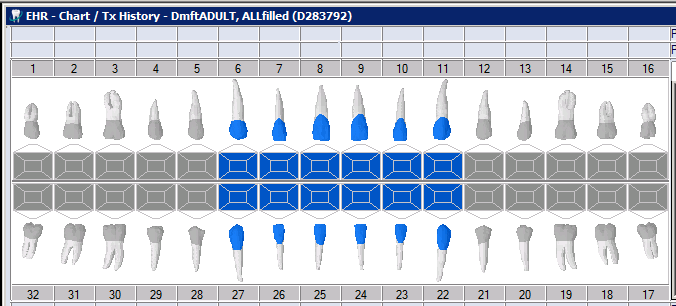

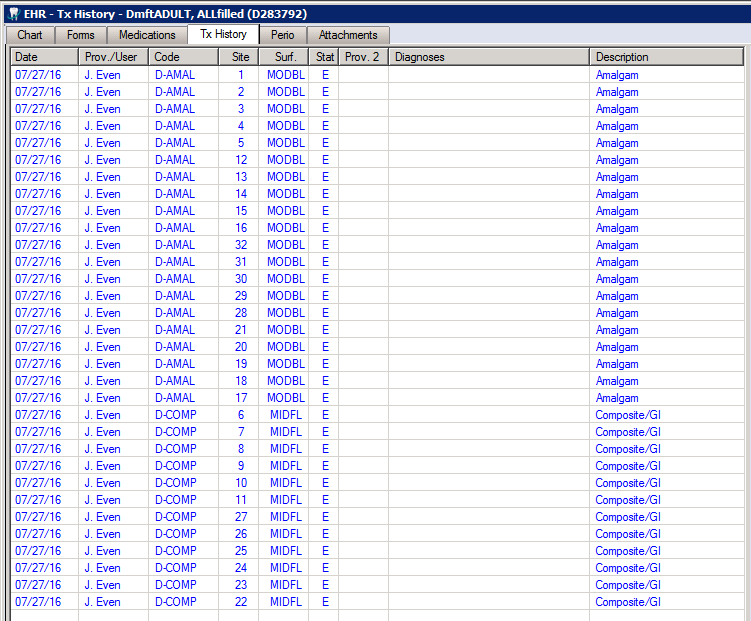

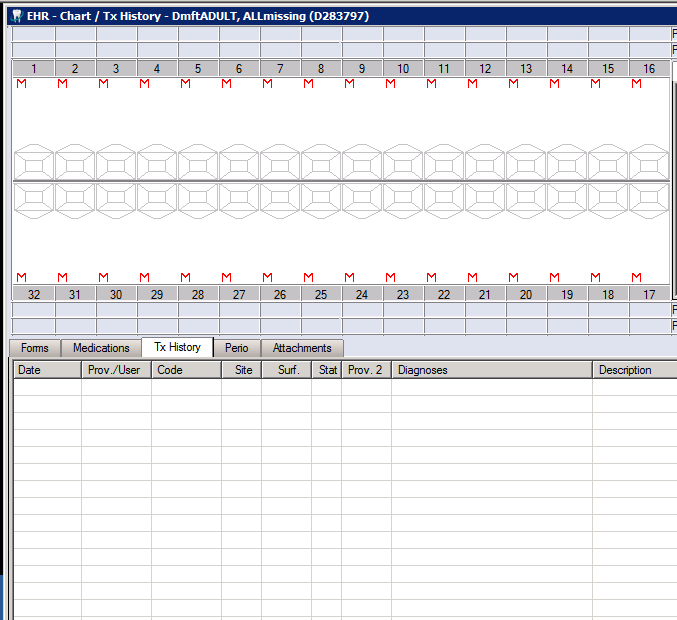


D283891

D283746


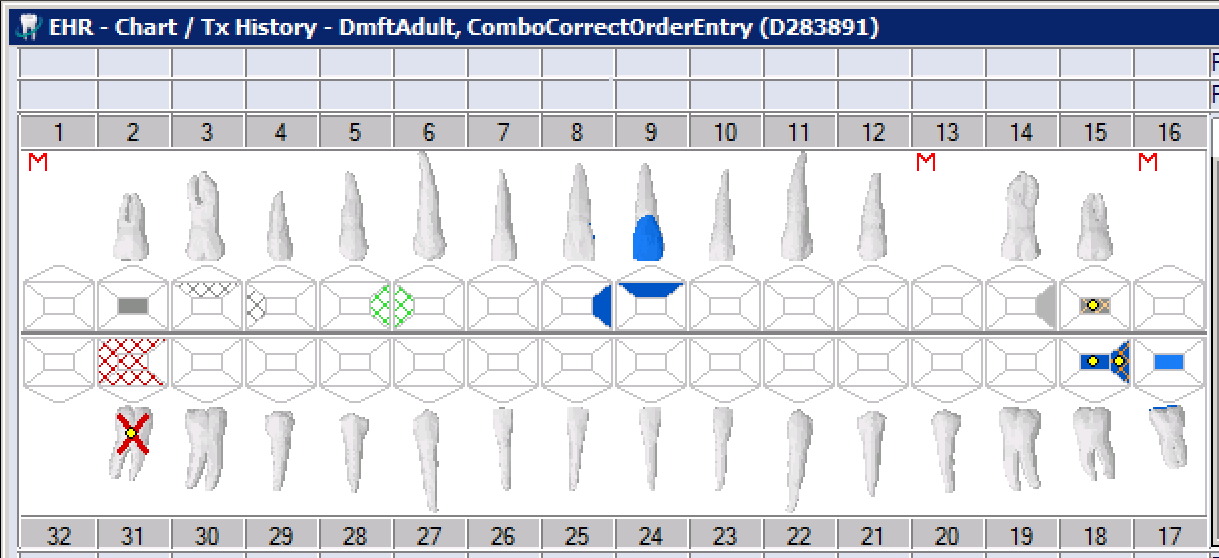

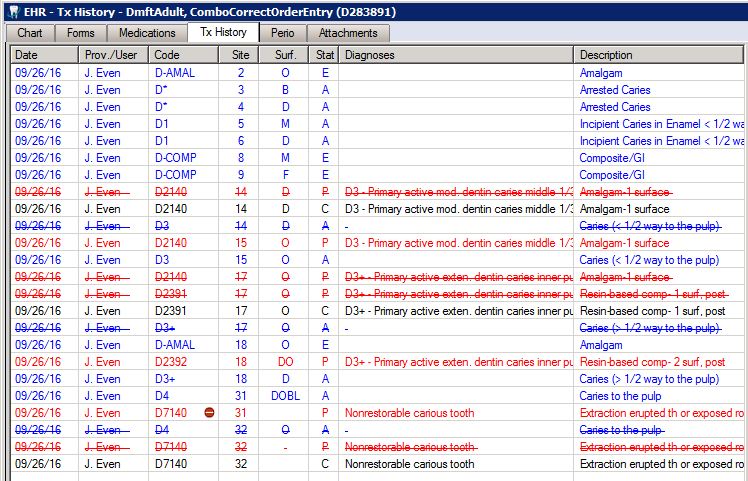

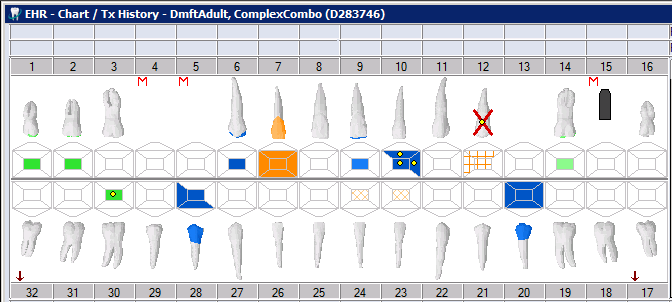

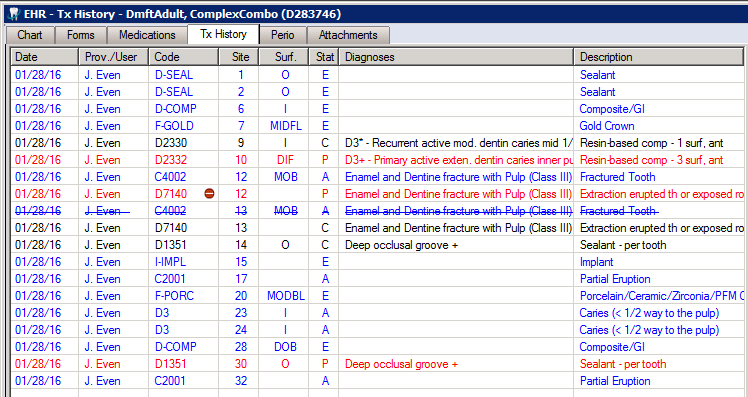


D283738

D283736


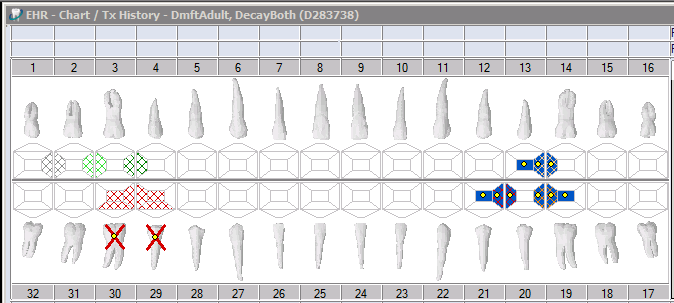

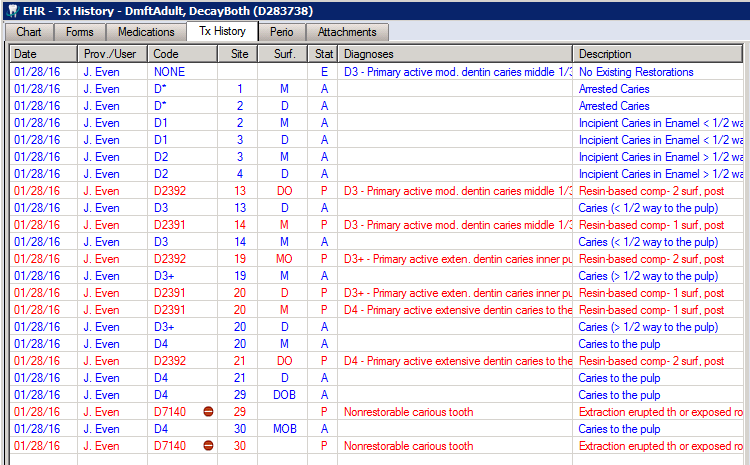

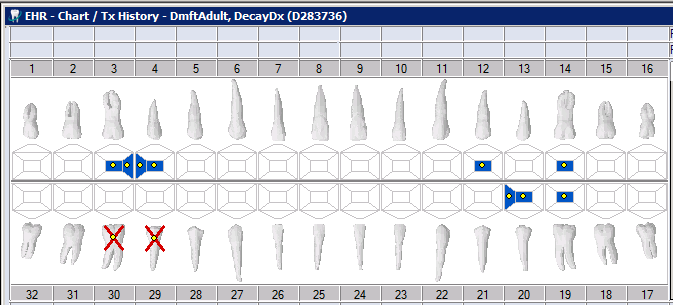

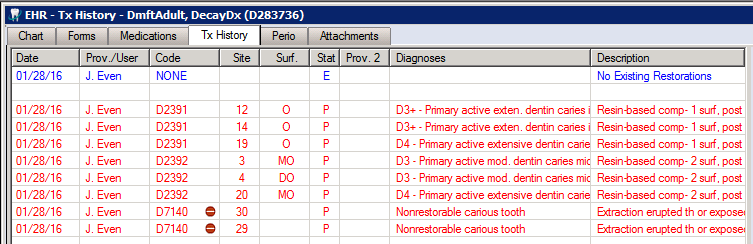


D283735

D283742


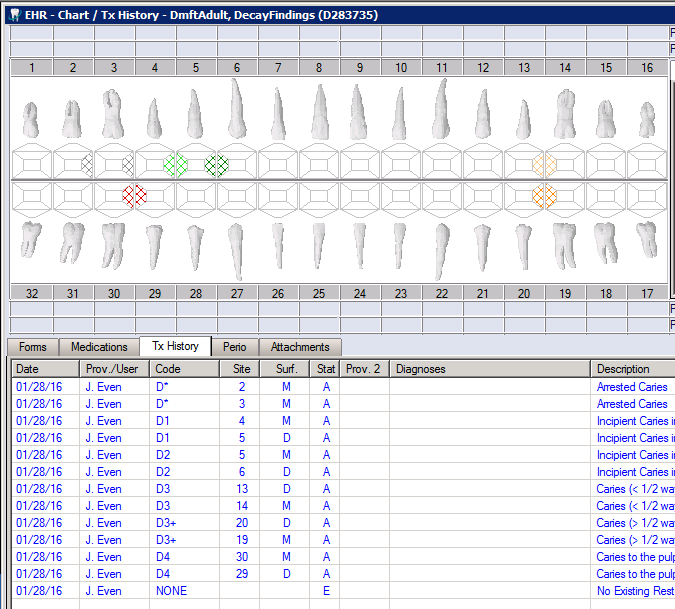

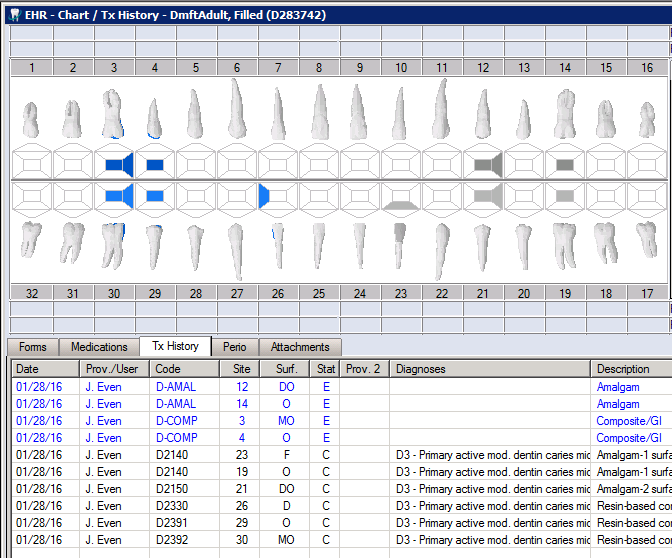


D283772

D283776


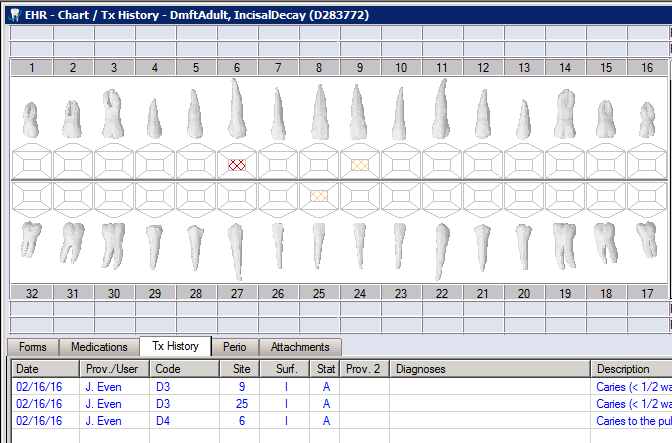

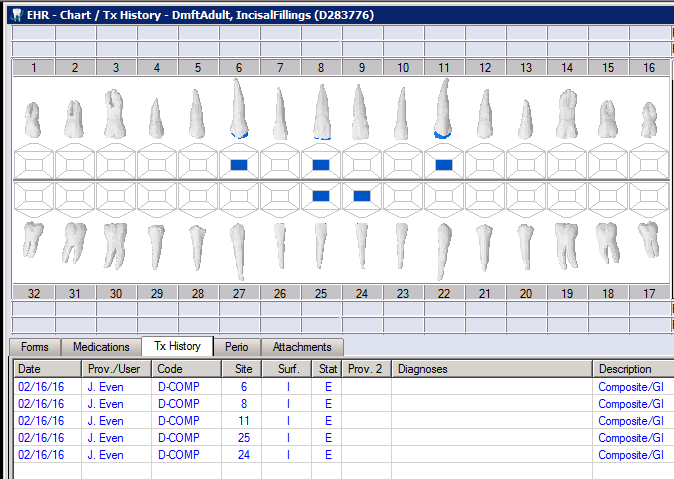


D283740

D283733


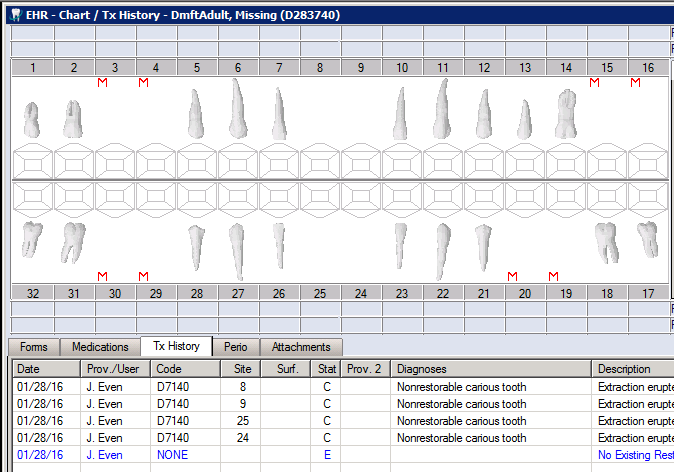

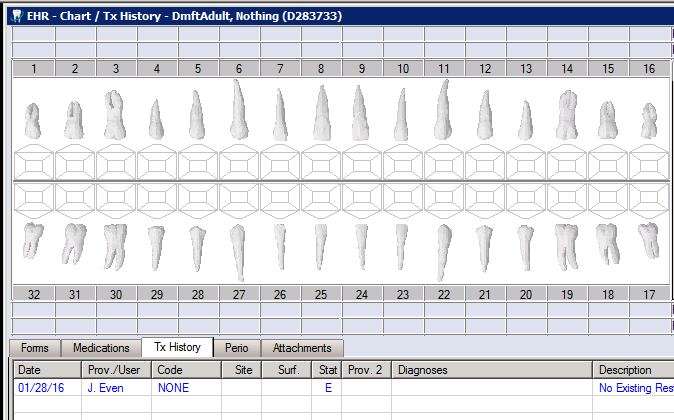


D283815


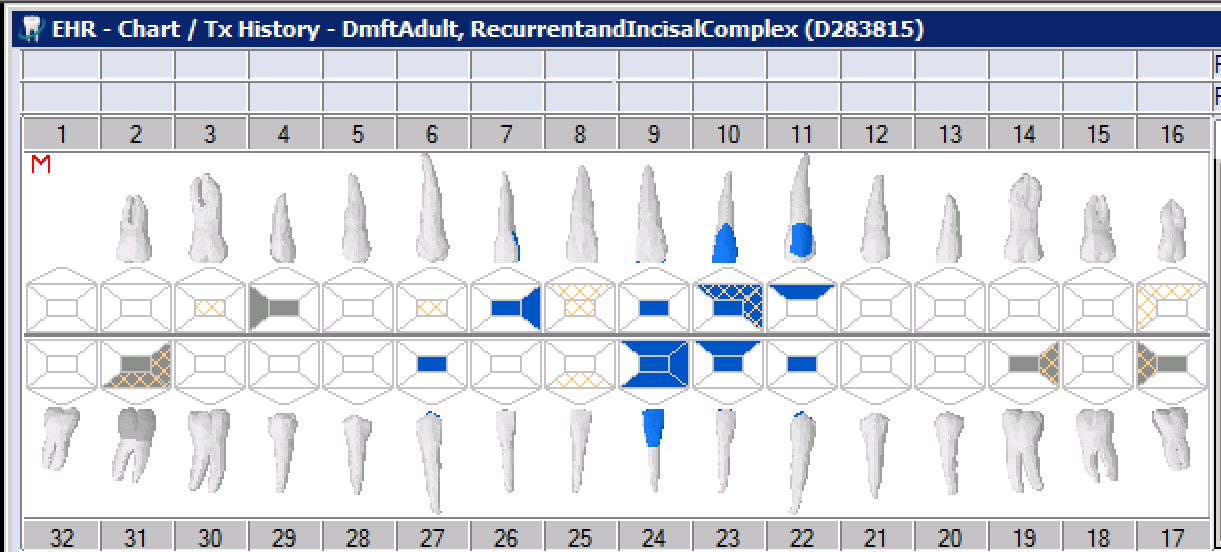

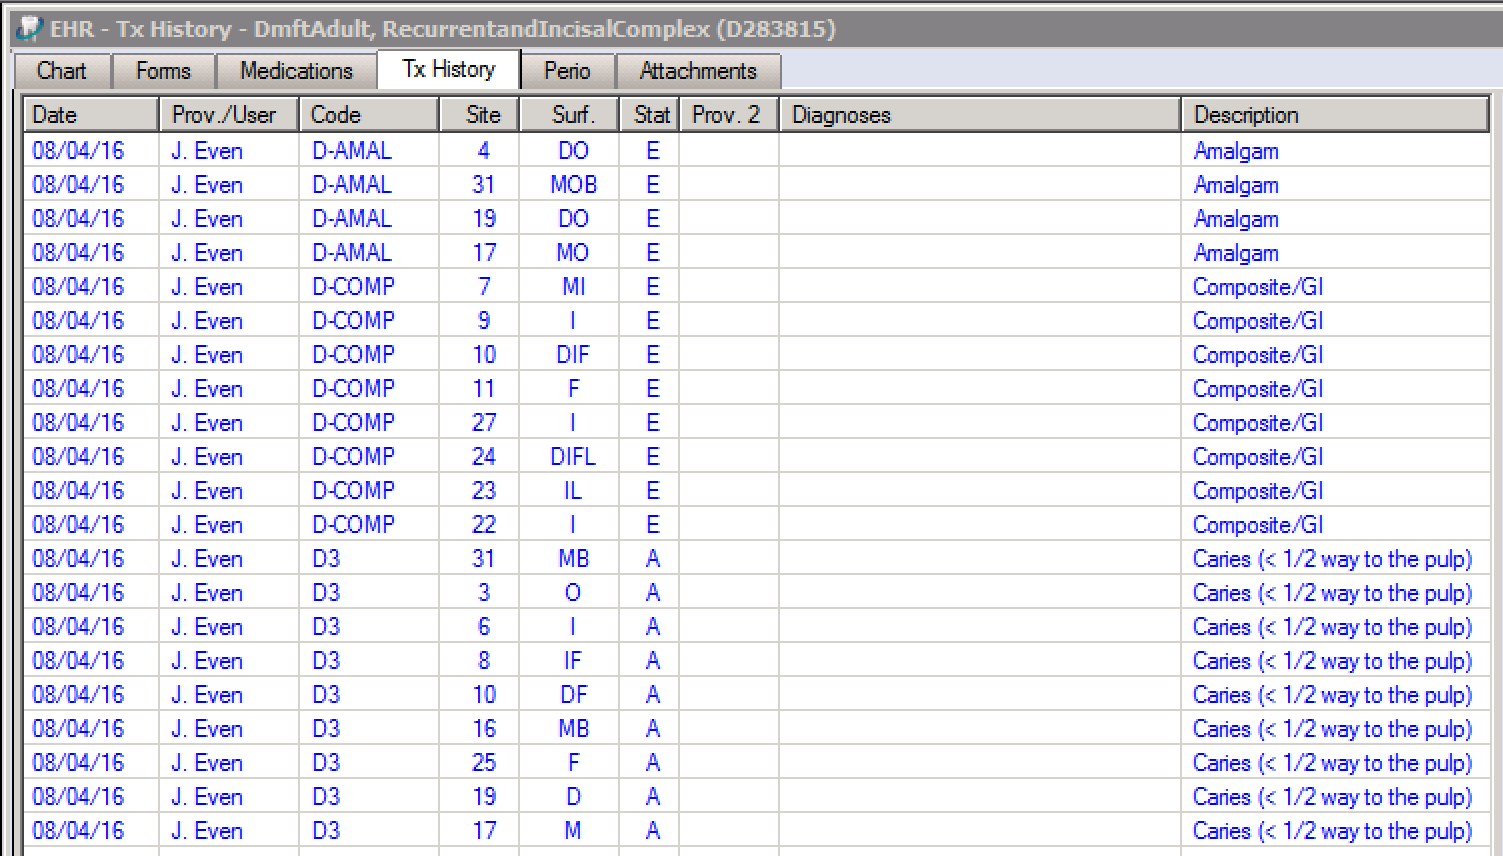

Supplement: Supplementary file 1 [file 15342680]
